# Supplementary material
Source: PubMed Central journal article supplement (PMC7236480)
Supplement: NIHMS1563180-supplement-Supplemental_Digital_Content_1.pdf [file NIHMS1563180-supplement-Supplemental_Digital_Content_1.pdf]

## **Appendix 1.**

Institutions involved in the Consortium include, in alphabetical order: Baystate Medical Center, Springfield, MA; Cedars-Sinai Medical Center Burnes Allen Research Center, Los Angeles, CA; Christiana Care Health System, Newark, DE; Georgetown University Hospital , MedStar Health, Washington, DC; Indiana University Clarian Health, Indianapolis, IN; Intermountain Healthcare and the University of Utah, Salt Lake City, Utah; Maimonides Medical Center, Brooklyn, NY; MetroHealth Medical Center, Cleveland, OH.; Summa Health System, Akron City Hospital, Akron, OH; The EMMES Corporation, Rockville MD (Data Coordinating Center); University of Illinois at Chicago, Chicago, IL; University of Miami, Miami, FL; and University of Texas Health Science Center at Houston, Houston, Texas.

Venkatesh KK, Strauss RA, Grotegut C, Heine RP, Chescheir NC, Stringer JSA, et al. Machine learning and statistical models to predict postpartum hemorrhage. *Obstet Gynecol* 2020;135.

The authors provided this information as a supplement to their article.

©2020 American College of Obstetricians and Gynecologists.

Page 1 of 14

| <b>Appendix 2. Characteristics Overall and by EBL</b> |                              |                          |                         |
|-------------------------------------------------------|------------------------------|--------------------------|-------------------------|
| <b>Characteristic</b>                                 | <b>Overall<br/>N=228,438</b> | <b>EBL<br/>N=152,279</b> |                         |
|                                                       |                              | <b>EBL ≥1,000 mL</b>     | <b>EBL &lt;1,000 mL</b> |
|                                                       |                              | <b>N=7,279</b>           | <b>N=145,000</b>        |
| <b>Mode of delivery, overall</b>                      |                              |                          |                         |
| Vaginal                                               | 162,448 (71.1)               | 654 (8.9)                | 108,218 (74.6)          |
| Cesarean                                              | 65,990 (28.8)                | 6,625 (91.0)             | 36,782 (25.3)           |
| <b>Mode of delivery, by subtype</b>                   |                              |                          |                         |
| Vaginal                                               | 146,073 (63.9)               | 558 (7.6)                | 97,381 (67.1)           |
| Operative                                             | 10,698 (4.6)                 | 71 (0.9)                 | 6,600 (4.5)             |
| Vaginal birth after cesarean                          | 5,677 (2.4)                  | 25 (0.3)                 | 4,237 (2.9)             |
| Primary cesarean                                      | 39,577 (17.3)                | 4,303 (59.1)             | 22,011 (15.1)           |
| Repeat cesarean                                       | 26,413 (11.5)                | 2,322 (31.9)             | 14,771 (10.1)           |
| <b>Socio-demographic variables</b>                    |                              |                          |                         |
| <b>Age, mean (SD), years</b>                          | 27.6 (6.19)                  | 29.2 (6.60)              | 27.5 (6.29)             |
| <b>Age, median (IQR), years</b>                       | 29 (24, 30)                  | 30 (25, 35)              | 27 (23, 32)             |
| <b>Missing n (%)</b>                                  | 323 (0.1%)                   | 3 (0.1%)                 | 272 (0.1%)              |
| <b>Race</b>                                           |                              |                          |                         |
| White                                                 | 113,224 (51.7)               | 3,078 (44.4)             | 69,410 (49.9)           |
| Black                                                 | 51,392 (23.5)                | 2,347 (33.8)             | 37,131 (26.7)           |
| Latina                                                | 39,716 (18.1)                | 1,048 (15.1)             | 22,522 (16.2)           |
| Asian                                                 | 9,345 (4.3)                  | 316 (4.5)                | 6,876 (4.9)             |
| Other                                                 | 5,400 (2.5)                  | 142 (2.0)                | 2,953 (2.1)             |
| <b>Missing n (%)</b>                                  | 9,361 (4.0)                  | 119 (4.4)                | 6337 (4.2)              |
| <b>Region</b>                                         |                              |                          |                         |
| West                                                  | 68,712 (30.0)                | 803 (11.0)               | 37,109 (25.5)           |
| Midwest                                               | 34,683 (15.1)                | 1,824 (25.0)             | 30,793 (21.2)           |
| South                                                 | 69,268 (30.3)                | 2,822 (38.7)             | 44,080 (30.4)           |
| Northeast                                             | 55,775 (24.4)                | 1,830 (25.1)             | 33,018 (22.7)           |
| <b>Missing n (%)</b>                                  | 0 (--)                       | 0 (--)                   | 0 (--)                  |
| <b>Academic hospital</b>                              | 130,205 (57.0)               | 3,591 (49.3)             | 72,987 (50.3)           |
| <b>Missing n (%)</b>                                  | 0 (--)                       | 0 (--)                   | 0 (--)                  |
| <b>Delivery year</b>                                  |                              |                          |                         |
| 2002                                                  | 7,357 (3.2)                  | 455 (6.2)                | 6,385 (4.4)             |
| 2003                                                  | 9,649 (4.2)                  | 590 (8.1)                | 8,613 (5.9)             |
| 2004                                                  | 15,576 (6.8)                 | 755 (10.3)               | 13,331 (9.2)            |
| 2005                                                  | 63,680 (32.0)                | 1,814 (24.9)             | 37,056 (25.5)           |
| 2006                                                  | 73,154 (32.0)                | 2,071 (28.4)             | 43,625 (30.0)           |
| 2007                                                  | 58,671 (25.6)                | 1,575 (21.6)             | 35,670 (24.6)           |
| 2008                                                  | 292 (0.1)                    | 3 (0.1)                  | 278 (0.1)               |

Venkatesh KK, Strauss RA, Grotegut C, Heine RP, Chescheir NC, Stringer JSA, et al. Machine learning and statistical models to predict postpartum hemorrhage. *Obstet Gynecol* 2020;135.

The authors provided this information as a supplement to their article.

©2020 American College of Obstetricians and Gynecologists.

|                                            |                   |                    |                   |
|--------------------------------------------|-------------------|--------------------|-------------------|
| <b>Missing n (%)</b>                       | 59 (0)            | 0 (--)             | 44 (0.0)          |
| <b>Pre-pregnancy body mass index (BMI)</b> |                   |                    |                   |
| Mean (SD), kg/m <sup>2</sup>               | 25.4 (6.25)       | 29.0 (8.55)        | 25.4 (6.28)       |
| Median (IQR), kg/m <sup>2</sup>            | 23.9 (21.0, 28.2) | 26.8 (22.5, 33.6)  | 23.8 (21.0, 28.2) |
| <b>Missing n (%)</b>                       | 76,818 (33.6)     | 1,257 (46.5)       | 59,110 (39.5)     |
| <b>Pre-pregnancy weight</b>                |                   |                    |                   |
| Mean (SD), kg                              | 68.0 (17.6)       | 77.4 (24.4)        | 67.8 (17.6)       |
| Median (IQR), kg                           | 63.5 (56.2, 75.8) | 70.7 (58.9, 90.2)  | 63.5 (55.8, 75.7) |
| <b>Missing n (%)</b>                       | 67,294 (29.4)     | 1,239 (45.8)       | 57,721 (38.5)     |
| <b>Admission weight</b>                    |                   |                    |                   |
| Mean (SD), kg                              | 82.5 (17.9)       | 92.2 (23.7)        | 82.3 (17.8)       |
| Median (IQR), kg                           | 79.3 (70.0, 91.1) | 87.9 (75.0, 104.3) | 78.9 (69.9, 91.1) |
| <b>Missing n (%)</b>                       | 35,984 (15.7)     | 624 (23.0)         | 30,212 (20.1)     |
| <b>Tobacco use</b>                         | 15,247 (6.6)      | 499 (6.8)          | 9,889 (6.8)       |
| <b>Missing n (%)</b>                       | 0 (--)            | 0 (--)             | 0 (--)            |
| <b>Illicit drug use</b>                    | 4,725 (2.0)       | 220 (3.1)          | 3,337 (2.4)       |
| <b>Missing n (%)</b>                       | 22,544 (9.8%)     | 84 (3.1)           | 6,526 (4.3)       |
| <i>Maternal comorbidities</i>              |                   |                    |                   |
| <b>Pre-gestational diabetes</b>            | 5,305 (2.3)       | 495 (6.8)          | 3,747 (2.5)       |
| <b>Missing n (%)</b>                       | 0 (--)            | 0 (--)             | 0 (--)            |
| <b>Gestational diabetes</b>                | 11,999 (5.2)      | 700 (9.6)          | 7,223 (4.9)       |
| <b>Missing n (%)</b>                       | 0 (--)            | 0 (--)             | 0 (--)            |
| <b>Chronic hypertension</b>                | 7,690 (3.3)       | 467 (6.4)          | 4,073 (2.8)       |
| <b>Missing n (%)</b>                       | 0 (--)            | 0 (--)             | 0 (--)            |
| <b>Gestational hypertension</b>            | 6,286 (2.7)       | 257 (3.5)          | 3,589 (2.4)       |
| <b>Missing n (%)</b>                       | 0 (--)            | 0 (--)             | 0 (--)            |
| <b>Heart disease</b>                       | 3,481 (1.5)       | 176 (2.4)          | 2,170 (1.5)       |
| <b>Missing n (%)</b>                       | 0 (--)            | 0 (--)             | 0 (--)            |
| <b>Thyroid disease</b>                     | 5,583 (2.5)       | 232 (3.2)          | 3,301 (2.3)       |
| <b>Missing n (%)</b>                       | 7,878 (3.4)       | 84 (3.1)           | 6,526 (4.3)       |
| <b>Renal disease</b>                       | 1,856 (0.8)       | 98 (1.3)           | 1,574 (1.0)       |
| <b>Missing n (%)</b>                       | 0 (--)            | 0 (--)             | 0 (--)            |
| <b>Asthma</b>                              | 17,490 (7.6)      | 775 (10.6)         | 11,996 (8.2)      |
| <b>Missing n (%)</b>                       | 0 (--)            | 0 (--)             | 0 (--)            |
| <b>Anemia diagnosis</b>                    | 23,057 (10.4)     | 1,900 (26.9)       | 16,157 (11.6)     |
| <b>Missing n (%)</b>                       | 7,877 (3.4)       | 84 (3.1)           | 6,526 (4.3)       |
| <b>Depression</b>                          | 9,850 (4.3)       | 494 (6.7)          | 6,956 (4.8)       |
| <b>Missing n (%)</b>                       | 0 (--)            | 0 (--)             | 0 (--)            |
| <b>Gastrointestinal disease</b>            | 2,592 (1.1)       | 95 (1.3)           | 1,342 (0.9)       |
| <b>Missing n (%)</b>                       | 0 (--)            | 0 (--)             | 0 (--)            |
| <b>Active seizure disorder</b>             | 210 (0.1)         | 21 (0.3)           | 160 (0.1)         |
| <b>Missing n (%)</b>                       | 24,679 (10.8)     | 122 (4.5)          | 6,214 (4.1)       |
| <b>History of seizure disorder</b>         | 1,528 (0.7)       | 99 (1.4)           | 1,077 (0.7)       |
| <b>Missing n (%)</b>                       | 22,544 (9.8)      | 84 (3.1)           | 6,526 (4.3)       |
| <i>Obstetrical characteristics</i>         |                   |                    |                   |
| <b>Parity</b>                              |                   |                    |                   |
| Mean (SD)                                  | 1.1 (1.36)        | 1.1 (1.38)         | 1.1 (1.37)        |
| Median (IQR)                               | 1 (0, 2)          | 1 (0, 2)           | 1 (0, 2)          |
| <b>Missing n (%)</b>                       | 0 (--)            | 0 (--)             | 0 (--)            |
| <b>Assisted reproductive technology</b>    | 1,101 (0.9)       | 123 (2.8)          | 607 (0.8)         |

Venkatesh KK, Strauss RA, Grotegut C, Heine RP, Chescheir NC, Stringer JSA, et al. Machine learning and statistical models to predict postpartum hemorrhage. *Obstet Gynecol* 2020;135.

The authors provided this information as a supplement to their article.

©2020 American College of Obstetricians and Gynecologists.

Page 3 of 14

|                                                        |                      |                |              |               |
|--------------------------------------------------------|----------------------|----------------|--------------|---------------|
|                                                        | <b>Missing n (%)</b> | 107,479 (47.0) | 1,216 (44.9) | 72,745 (48.6) |
| <b>Multiple gestation</b>                              |                      |                |              |               |
| Twins                                                  |                      | 4,840 (2.1)    | 768 (10.5)   | 2,670 (1.8)   |
| Higher order                                           |                      | 213 (0.0)      | 69 (0.9)     | 87 (0.0)      |
|                                                        | <b>Missing n (%)</b> | 0 (--)         | 0 (--)       | 0 (--)        |
| <b>Breech presentation</b>                             |                      | 11,647 (5.1)   | 1,170 (16.0) | 5,923 (4.0)   |
|                                                        | <b>Missing n (%)</b> | 0 (--)         | 0 (--)       | 0 (--)        |
| <b>History of prior preterm birth</b>                  |                      | 17,017 (7.6)   | 788 (10.8)   | 11,811 (8.1)  |
|                                                        | <b>Missing n (%)</b> | 5,436 (2.3)    | 1 (--)       | 131 (0.1)     |
| <b>Polyhydramnios</b>                                  |                      | 885 (0.4)      | 82 (1.2)     | 509 (0.3)     |
|                                                        | <b>Missing n (%)</b> | 14,169 (6.2)   | 356 (13.1)   | 13,022 (8.7)  |
| <b>Macrosomia</b>                                      |                      | 1,858 (1.5)    | 222 (3.2)    | 1,191 (1.5)   |
|                                                        | <b>Missing n (%)</b> | 102,247 (44.7) | 153 (5.6)    | 70,424 (47.0) |
| <b>Pregnancy complications</b>                         |                      |                |              |               |
| <b>Prior cesarean delivery</b>                         |                      | 31,321 (14.5)  | 2,270 (31.8) | 18,403 (13.2) |
|                                                        | <b>Missing n (%)</b> | 13,219 (5.7)   | 66 (2.4)     | 5,638 (3.7)   |
| <b>Mild preeclampsia</b>                               |                      | 7,457 (3.2)    | 483 (6.6)    | 5,127 (3.5)   |
|                                                        | <b>Missing n (%)</b> | 0 (--)         | 0 (--)       | 0 (--)        |
| <b>Severe preeclampsia</b>                             |                      | 3,772 (1.6)    | 278 (3.8)    | 2,363 (1.6)   |
|                                                        | <b>Missing n (%)</b> | 0 (--)         | 0 (--)       | 0 (--)        |
| <b>Superimposed preeclampsia</b>                       |                      | 1,971 (0.8)    | 151 (2.0)    | 1,064 (0.7)   |
|                                                        | <b>Missing n (%)</b> | 0 (--)         | 0 (--)       | 0 (--)        |
| <b>Eclampsia</b>                                       |                      | 326 (0.1)      | 21 (0.3)     | 219 (0.1)     |
|                                                        | <b>Missing n (%)</b> | 15,614 (6.8)   | 316 (11.6)   | 13,328 (8.9)  |
| <b>Fetal death</b>                                     |                      | 1,145 (0.5)    | 69 (0.9)     | 436 (0.3)     |
|                                                        | <b>Missing n (%)</b> | 0 (--)         | 0 (--)       | 0 (--)        |
| <b>Group B streptococcus colonization</b>              |                      | 40,207 (17.6)  | 1,236 (16.9) | 27,736 (19.1) |
|                                                        | <b>Missing n (%)</b> | 0 (--)         | 0 (--)       | 0 (--)        |
| <b>Intrapartum magnesium sulfate</b>                   |                      | 8,763 (4.3)    | 708 (10.0)   | 6,648 (4.8)   |
|                                                        | <b>Missing n (%)</b> | 26,136 (11.4)  | 84 (3.1)     | 6,526 (4.3)   |
| <b>Placental abruption</b>                             |                      | 3,794 (1.6)    | 431 (5.9)    | 2,316 (1.6)   |
|                                                        | <b>Missing n (%)</b> | 0 (--)         | 0 (--)       | 0 (--)        |
| <b>Fetal growth restriction</b>                        |                      | 2,678 (1.2)    | 105 (1.6)    | 1,719 (1.3)   |
|                                                        | <b>Missing n (%)</b> | 15,626 (6.8)   | 318 (11.7)   | 13,334 (8.9)  |
| <b>Large for gestational age, antepartum diagnosis</b> |                      | 2,031 (1.4)    | 203 (3.5)    | 1,127 (1.1)   |
|                                                        | <b>Missing n (%)</b> | 84,338 (36.9)  | 627 (23.2)   | 50,937 (34.0) |
| <b>Antenatal steroids</b>                              |                      | 5,945 (4.0)    | 388 (9.5)    | 3,447 (3.7)   |
|                                                        | <b>Missing n (%)</b> | 82,507 (36.1)  | 1,104 (40.8) | 56,141 (37.5) |
| <b>Antepartum bleeding in third trimester</b>          |                      | 3,088 (1.7)    | 213 (3.9)    | 2,192 (2.1)   |
|                                                        | <b>Missing n (%)</b> | 49,410 (21.6)  | 767 (28.3)   | 45,372 (30.3) |
| <b>Placenta previa</b>                                 |                      | 1,647 (0.7)    | 357 (4.9)    | 738 (0.5)     |
|                                                        | <b>Missing n (%)</b> | 0 (--)         | 0 (--)       | 0 (--)        |
| <b>Placenta accreta</b>                                |                      | 138 (0.0)      | 69 (1.2)     | 51 (0.0)      |
|                                                        | <b>Missing n (%)</b> | 82,335 (36.0)  | 767 (28.3)   | 45,372 (30.3) |
| <b>Threatened preterm birth antepartum</b>             |                      | 7,880 (3.4)    | 366 (5.0)    | 4,367 (3.0)   |
|                                                        | <b>Missing n (%)</b> | 0 (--)         | 0 (--)       | 0 (--)        |
| <b>Antepartum hospital admission</b>                   |                      | 17,500 (7.6)   | 429 (13.2)   | 8,620 (11.3)  |
|                                                        | <b>Missing n (%)</b> | 84,603 (37.0)  | 1,378 (50.9) | 71,627 (47.8) |
| <b>Gestational age at delivery, weeks</b>              |                      |                |              |               |

Venkatesh KK, Strauss RA, Grotegut C, Heine RP, Chescheir NC, Stringer JSA, et al. Machine learning and statistical models to predict postpartum hemorrhage. *Obstet Gynecol* 2020;135.

The authors provided this information as a supplement to their article.

©2020 American College of Obstetricians and Gynecologists.

Page 4 of 14

|                                             |                |               |                |
|---------------------------------------------|----------------|---------------|----------------|
| Mean (SD)                                   | 38.2 (2.47)    | 37.2 (3.50)   | 38.2 (2.43)    |
| Median (IQR)                                | 39 (38, 40)    | 38 (36, 39)   | 39 (38, 40)    |
| <b>Missing n (%)</b>                        | 0 (--)         | 0 (--)        | 0 (--)         |
| <b>Characteristics on L&amp;D admission</b> |                |               |                |
| <b>Temperature (F)</b>                      |                |               |                |
| Mean (SD)                                   | 98.0 (0.81)    | 98.1 (0.89)   | 98.0 (0.80)    |
| <b>Missing n (%)</b>                        | 47,977 (21.0)  | 682 (25.2)    | 30,097 (20.1)  |
| <b>Systolic blood pressure</b>              |                |               |                |
| Mean (SD)                                   | 124.1 (14.89)  | 125.6 (16.81) | 123.9 (14.73)  |
| <b>Missing n (%)</b>                        | 52,766 (23.0)  | 618 (22.8)    | 34,530 (23.0)  |
| <b>Diastolic blood pressure</b>             |                |               |                |
| Mean (SD)                                   | 74.3 (11.6)    | 74.0 (13.07)  | 74.1 (11.76)   |
| <b>Missing n (%)</b>                        |                | 617 (22.8)    | 34,549 (23.0)  |
| <b>Trial of labor</b>                       | 192,074 (84.0) | 3,684 (50.6)  | 124,529 (85.9) |
| <b>Missing n (%)</b>                        | 0 (--)         | 0 (--)        | 0 (--)         |
| <b>Spontaneous labor</b>                    | 122,673 (53.7) | 2,412 (33.1)  | 80,749 (55.6)  |
| <b>Missing n (%)</b>                        | 0 (--)         | 0 (--)        | 0 (--)         |
| <b>Premature rupture of membranes</b>       | 16,219 (7.1)   | 620 (8.5)     | 11,768 (8.1)   |
| <b>Missing n (%)</b>                        | 0 (--)         | 0 (--)        | 0 (--)         |
| <b>Chorioamnionitis on admission</b>        | 1,527 (1.0)    | 157 (2.6)     | 886 (0.9)      |
| <b>Missing n (%)</b>                        | 83,009 (36.3)  | 515 (19.0)    | 50,343 (33.6)  |

Venkatesh KK, Strauss RA, Grotegut C, Heine RP, Chescheir NC, Stringer JSA, et al. Machine learning and statistical models to predict postpartum hemorrhage. *Obstet Gynecol* 2020;135.

The authors provided this information as a supplement to their article.

©2020 American College of Obstetricians and Gynecologists.

Page 5 of 14

| <b>Appendix 3. Characteristics Overall and by Time Period</b> |                              |                                                                                                             |                               |
|---------------------------------------------------------------|------------------------------|-------------------------------------------------------------------------------------------------------------|-------------------------------|
| <b>Characteristic</b>                                         | <b>Overall<br/>N=228,438</b> | <b>Comparison between two time periods (2002-2006 vs. 2007-2008) for temporal validation<br/>N=152,232*</b> |                               |
|                                                               |                              | <b>2002-2006<br/>N=114,695</b>                                                                              | <b>2007-2008<br/>N=37,537</b> |
| <b>Estimated blood loss (EBL)</b>                             |                              |                                                                                                             |                               |
| EBL ≥1,000 mL                                                 | --                           | 5,685 (5.0)                                                                                                 | 1,589 (4.2)                   |
| EBL <1,000 mL                                                 |                              | 109,010 (95.0)                                                                                              | 35,948 (95.8)                 |
| <b>Mode of delivery, overall</b>                              |                              |                                                                                                             |                               |
| Vaginal                                                       | 162,448 (71.1)               | 81,892 (71.5)                                                                                               | 26,851 (71.5)                 |
| Cesarean                                                      | 65,990 (28.8)                | 32,713 (28.5)                                                                                               | 10,686 (28.5)                 |
| <b>Mode of delivery, by subtype</b>                           |                              |                                                                                                             |                               |
| Vaginal                                                       | 146,073 (63.9)               | 73,848 (64.4)                                                                                               | 24,055 (64.1)                 |
| Operative                                                     | 10,698 (4.6)                 | 4,944 (4.3)                                                                                                 | 1,726 (4.6)                   |
| Vaginal birth after cesarean                                  | 5,677 (2.4)                  | 3,190 (2.8)                                                                                                 | 1,070 (2.9)                   |
| Primary cesarean                                              | 39,577 (17.3)                | 20,028 (17.5)                                                                                               | 6,282 (16.7)                  |
| Repeat cesarean                                               | 26,413 (11.5)                | 12,685 (11.1)                                                                                               | 4,404 (11.7)                  |
| <b>Socio-demographic variables</b>                            |                              |                                                                                                             |                               |
| <b>Age, mean (SD), years</b>                                  | 27.6 (6.19)                  | 27.6 (6.33)                                                                                                 | 27.5 (6.28)                   |
| <b>Age, median (IQR), years</b>                               | 29 (24, 30)                  | 27 (23, 32)                                                                                                 | 27 (23, 32)                   |
| <b>Missing n (%)</b>                                          | 323 (0.1)                    | 233 (0.2)                                                                                                   | 41 (0.1)                      |
| <b>Race</b>                                                   |                              |                                                                                                             |                               |
| White                                                         | 113,224 (51.7)               | 53,670 (48.9)                                                                                               | 18,806 (52.1)                 |
| Black                                                         | 51,392 (23.5)                | 29,914 (27.3)                                                                                               | 9,541 (26.4)                  |
| Latina                                                        | 39,716 (18.1)                | 18,382 (16.8)                                                                                               | 5,187 (14.4)                  |
| Asian                                                         | 9,345 (4.3)                  | 5,325 (4.9)                                                                                                 | 1,865 (5.2)                   |
| Other                                                         | 5,400 (2.5)                  | 2,414 (2.2)                                                                                                 | 680 (1.9)                     |
| <b>Missing n (%)</b>                                          | 9,361 (4.0)                  | 4,990 (4.4)                                                                                                 | 1,458 (3.9)                   |
| <b>Region</b>                                                 |                              |                                                                                                             |                               |
| West                                                          | 68,712 (30.0)                | 26,590 (23.2)                                                                                               | 11,322 (30.2)                 |
| Midwest                                                       | 34,683 (15.1)                | 23,044 (20.1)                                                                                               | 9,571 (25.5)                  |
| South                                                         | 69,268 (30.3)                | 36,870 (32.2)                                                                                               | 9,987 (26.6)                  |
| Northeast                                                     | 55,775 (24.4)                | 28,191 (24.6)                                                                                               | 6,657 (17.7)                  |
| <b>Missing n (%)</b>                                          | 0 (--)                       | 0 (--)                                                                                                      | 0 (--)                        |
| <b>Academic hospital</b>                                      | 130,205 (57.0)               | 57,584 (50.2)                                                                                               | 18,959 (50.5)                 |
| <b>Missing n (%)</b>                                          | 0 (--)                       | 0 (--)                                                                                                      | 0 (--)                        |
| <b>Pre-pregnancy body mass index (BMI)</b>                    |                              |                                                                                                             |                               |
| Mean (SD), kg/m <sup>2</sup>                                  | 25.4 (6.25)                  | 25.5 (6.42)                                                                                                 | 25.6 (6.45)                   |
| Median (IQR), kg/m <sup>2</sup>                               | 23.9 (21.0, 28.2)            | 23.9 (21.0, 28.3)                                                                                           | 23.9 (21.1, 28.5)             |
| <b>Missing n (%)</b>                                          | 76,818 (33.6)                | 46,979 (40.9)                                                                                               | 13,357 (35.6)                 |
| <b>Pre-pregnancy weight</b>                                   |                              |                                                                                                             |                               |
| Mean (SD), kg                                                 | 68.0 (17.6)                  | 68.2 (18.0)                                                                                                 | 68.3 (18.1)                   |
| Median (IQR), kg                                              | 63.5 (56.2, 75.8)            | 63.5 (56.2, 76.6)                                                                                           | 63.5 (56.2, 77.0)             |
| <b>Missing n (%)</b>                                          | 67,294 (29.4)                | 45,881 (40.0)                                                                                               | 13,049 (34.7)                 |

Venkatesh KK, Strauss RA, Grotegut C, Heine RP, Chescheir NC, Stringer JSA, et al. Machine learning and statistical models to predict postpartum hemorrhage. *Obstet Gynecol* 2020;135.

The authors provided this information as a supplement to their article.

©2020 American College of Obstetricians and Gynecologists.

|                                         |                      |                   |                   |
|-----------------------------------------|----------------------|-------------------|-------------------|
| <b>Admission weight</b>                 |                      |                   |                   |
| Mean (SD), kg                           | 82.5 (17.9)          | 82.8 (18.3)       | 82.7 (18.2)       |
| Median (IQR), kg                        | 79.3 (70.0, 91.1)    | 79.4 (70.0, 91.6) | 79.4 (69.9, 91.6) |
|                                         | <b>Missing n (%)</b> |                   |                   |
| <b>Tobacco use</b>                      | 15,247 (6.6)         | 7,751 (6.8)       | 2,637 (7.0)       |
|                                         | <b>Missing n (%)</b> |                   |                   |
| <b>Illicit drug use</b>                 | 4,725 (2.0)          | 2,698 (2.4)       | 858 (2.3)         |
|                                         | <b>Missing n (%)</b> |                   |                   |
|                                         | 22,544 (9.8)         | 4,864 (4.2)       | 1,746 (4.7)       |
| <b>Maternal comorbidities</b>           |                      |                   |                   |
| <b>Pre-gestational diabetes</b>         | 5,305 (2.3)          | 3,410 (3.0)       | 832 (2.2)         |
|                                         | <b>Missing n (%)</b> |                   |                   |
|                                         | 0 (--)               | 0 (--)            | 0 (--)            |
| <b>Gestational diabetes</b>             | 11,999 (5.2)         | 6,044 (5.3)       | 1,877 (5.0)       |
|                                         | <b>Missing n (%)</b> |                   |                   |
|                                         | 0 (--)               | 0 (--)            | 0 (--)            |
| <b>Chronic hypertension</b>             | 7,690 (3.3)          | 3,366 (2.9)       | 1,173 (3.1)       |
|                                         | <b>Missing n (%)</b> |                   |                   |
|                                         | 0 (--)               | 0 (--)            | 0 (--)            |
| <b>Gestational hypertension</b>         | 6,286 (2.7)          | 2,964 (2.6)       | 881 (2.4)         |
|                                         | <b>Missing n (%)</b> |                   |                   |
|                                         | 0 (--)               | 0 (--)            | 0 (--)            |
| <b>Heart disease</b>                    | 3,481 (1.5)          | 1,785 (1.6)       | 561 (1.5)         |
|                                         | <b>Missing n (%)</b> |                   |                   |
|                                         | 0 (--)               | 0 (--)            | 0 (--)            |
| <b>Thyroid disease</b>                  | 5,583 (2.5)          | 2,637 (2.4)       | 896 (2.5)         |
|                                         | <b>Missing n (%)</b> |                   |                   |
|                                         | 7,878 (3.4)          | 4,864 (4.2)       | 1,746 (4.7)       |
| <b>Renal disease</b>                    | 1,856 (0.8)          | 1,259 (1.1)       | 413 (1.1)         |
|                                         | <b>Missing n (%)</b> |                   |                   |
|                                         | 0 (--)               | 0 (--)            | 0 (--)            |
| <b>Asthma</b>                           | 17,490 (7.6)         | 9,729 (8.5)       | 3,041 (8.1)       |
|                                         | <b>Missing n (%)</b> |                   |                   |
|                                         | 0 (--)               | 0 (--)            | 0 (--)            |
| <b>Anemia diagnosis</b>                 | 23,057 (10.4)        | 12,938 (11.3)     | 5,114 (13.6)      |
|                                         | <b>Missing n (%)</b> |                   |                   |
|                                         | 7,877 (3.4)          | 4,864 (4.2)       | 1,746 (4.6)       |
| <b>Depression</b>                       | 9,850 (4.3)          | 5,225 (4.6)       | 2,224 (5.9)       |
|                                         | <b>Missing n (%)</b> |                   |                   |
|                                         | 0 (--)               | 0 (--)            | 0 (--)            |
| <b>Gastrointestinal disease</b>         | 2,592 (1.1)          | 1,031 (0.9)       | 406 (1.1)         |
|                                         | <b>Missing n (%)</b> |                   |                   |
|                                         | 0 (--)               | 0 (--)            | 0 (--)            |
| <b>Active seizure disorder</b>          | 210 (0.1)            | 144 (0.1)         | 37 (0.1)          |
|                                         | <b>Missing n (%)</b> |                   |                   |
|                                         | 24,679 (10.8)        | 2,677 (2.3)       | 3,659 (9.8)       |
| <b>History of seizure disorder</b>      | 1,528 (0.7)          | 889 (0.8)         | 287 (0.8)         |
|                                         | <b>Missing n (%)</b> |                   |                   |
|                                         | 22,544 (9.8)         | 4,864 (4.2)       | 1,746 (4.7)       |
| <b>Obstetrical characteristics</b>      |                      |                   |                   |
| <b>Parity</b>                           |                      |                   |                   |
| Mean (SD)                               | 1.1 (1.36)           | 1.1 (1.37)        | 1.2 (1.37)        |
| Median (IQR)                            | 1 (0, 2)             | 1 (0, 2)          | 1 (0, 2)          |
|                                         | <b>Missing n (%)</b> |                   |                   |
|                                         | 0 (--)               | 0 (--)            | 0 (--)            |
| <b>Assisted reproductive technology</b> | 1,101 (0.9)          | 547 (0.5)         | 183 (0.5)         |
|                                         | <b>Missing n (%)</b> |                   |                   |
|                                         | 107,479 (47.0)       | 55,449 (48.3)     | 18,512 (49.3)     |
| <b>Multiple gestation</b>               |                      |                   |                   |
| Twins                                   | 4,840 (2.1)          | 2,650 (2.3)       | 782 (2.1)         |
| Higher order                            | 213 (0.0)            | 131 (0.1)         | 25 (0.1)          |
|                                         | <b>Missing n (%)</b> |                   |                   |
|                                         | 0 (--)               | 0 (--)            | 0 (--)            |
| <b>Breech presentation</b>              | 11,647 (5.1)         | 6,123 (5.3)       | 1,863 (5.0)       |
|                                         | <b>Missing n (%)</b> |                   |                   |
|                                         | 0 (--)               | 0 (--)            | 0 (--)            |
| <b>History of prior preterm birth</b>   | 17,017 (7.6)         | 9,416 (8.2)       | 3,181 (8.5)       |
|                                         | <b>Missing n (%)</b> |                   |                   |
|                                         | 5,436 (2.3)          | 83 (0.1)          | 49 (0.1)          |

Venkatesh KK, Strauss RA, Grotegut C, Heine RP, Chescheir NC, Stringer JSA, et al. Machine learning and statistical models to predict postpartum hemorrhage. *Obstet Gynecol* 2020;135.

The authors provided this information as a supplement to their article.

©2020 American College of Obstetricians and Gynecologists.

Page 7 of 14

|                                                        |                |               |               |
|--------------------------------------------------------|----------------|---------------|---------------|
| <b>Polyhydramnios</b>                                  | 885 (0.4)      | 468 (0.4)     | 123 (0.3)     |
| <b>Missing n (%)</b>                                   | 14,169 (6.2)   | 7,560 (6.6)   | 5,818 (15.5)  |
| <b>Macrosomia</b>                                      | 1,858 (1.5)    | 1,069 (0.9)   | 344 (0.9)     |
| <b>Missing n (%)</b>                                   | 102,247 (44.7) | 53,835 (46.9) | 16,713 (44.5) |
| <i>Pregnancy complications</i>                         |                |               |               |
| <b>Prior cesarean delivery</b>                         | 31,321 (14.5)  | 15,441 (13.5) | 5,226 (13.9)  |
| <b>Missing n (%)</b>                                   | 13,219 (5.7)   | 3,613 (3.2)   | 2,083 (5.6)   |
| <b>Mild preeclampsia</b>                               | 7,457 (3.2)    | 4,237 (3.7)   | 1,371 (3.7)   |
| <b>Missing n (%)</b>                                   | 0 (--)         | 0 (--)        | 0 (--)        |
| <b>Severe preeclampsia</b>                             | 3,772 (1.6)    | 1,909 (1.7)   | 731 (2.0)     |
| <b>Missing n (%)</b>                                   | 0 (--)         | 0 (--)        | 0 (--)        |
| <b>Superimposed preeclampsia</b>                       | 1,971 (0.8)    | 912 (0.8)     | 302 (0.8)     |
| <b>Missing n (%)</b>                                   | 0 (--)         | 0 (--)        | 0 (--)        |
| <b>Eclampsia</b>                                       | 326 (0.1)      | 183 (0.2)     | 57 (0.2)      |
| <b>Missing n (%)</b>                                   | 15,614 (6.8)   | 9,741 (8.5)   | 3,903 (10.4)  |
| <b>Fetal death</b>                                     | 1,145 (0.5)    | 559 (0.5)     | 168 (0.5)     |
| <b>Missing n (%)</b>                                   | 0 (--)         | 0 (--)        | 0 (--)        |
| <b>Group B streptococcus colonization</b>              | 40,207 (17.6)  | 21,533 (18.8) | 7,432 (19.8)  |
| <b>Missing n (%)</b>                                   | 0 (--)         | 0 (--)        | 0 (--)        |
| <b>Intrapartum magnesium sulfate</b>                   | 8,763 (4.3)    | 5,489 (4.8)   | 1,864 (5.0)   |
| <b>Missing n (%)</b>                                   | 26,136 (11.4)  | 4,864 (4.2)   | 1,746 (4.7)   |
| <b>Placental abruption</b>                             | 3,794 (1.6)    | 2,095 (1.8)   | 652 (1.7)     |
| <b>Missing n (%)</b>                                   | 0 (--)         | 0 (--)        | 0 (--)        |
| <b>Fetal growth restriction</b>                        | 2,678 (1.2)    | 1,451 (1.3)   | 373 (1.0)     |
| <b>Missing n (%)</b>                                   | 15,626 (6.8)   | 9,747 (8.5)   | 3,905 (10.4)  |
| <b>Large for gestational age, antepartum diagnosis</b> | 2,031 (1.4)    | 1,073 (0.9)   | 257 (0.7)     |
| <b>Missing n (%)</b>                                   | 84,338 (36.9)  | 36,337 (31.7) | 15,227 (40.5) |
| <b>Antenatal steroids</b>                              | 5,945 (4.0)    | 2,762 (2.4)   | 1,073 (2.9)   |
| <b>Missing n (%)</b>                                   | 82,507 (36.1)  | 47,303 (41.2) | 9,942 (26.5)  |
| <b>Antepartum bleeding in third trimester</b>          | 3,088 (1.7)    | 1,836 (1.6)   | 569 (1.5)     |
| <b>Missing n (%)</b>                                   | 49,410 (21.6)  | 36,293 (31.6) | 9,846 (26.2)  |
| <b>Placenta previa</b>                                 | 1,647 (0.7)    | 859 (0.8)     | 235 (0.6)     |
| <b>Missing n (%)</b>                                   | 0 (--)         | 0 (--)        | 0 (--)        |
| <b>Placenta accreta</b>                                | 138 (0.0)      | 97 (0.1)      | 23 (0.1)      |
| <b>Missing n (%)</b>                                   | 82,335 (36.0)  | 36,293 (31.6) | 9,846 (26.2)  |
| <b>Threatened preterm birth antepartum</b>             | 7,880 (3.4)    | 3,798 (3.3)   | 935 (2.5)     |
| <b>Missing n (%)</b>                                   | 0 (--)         | 0 (--)        | 0 (--)        |
| <b>Antepartum hospital admission</b>                   | 17,500 (7.6)   | 7,424 (6.5)   | 1,625 (4.3)   |
| <b>Missing n (%)</b>                                   | 84,603 (37.0)  | 55,696 (48.6) | 17,264 (46.0) |
| <b>Gestational age at delivery, weeks</b>              |                |               |               |
| Mean (SD)                                              | 38.2 (2.47)    | 38.1 (2.53)   | 38.2 (2.41)   |
| Median (IQR)                                           | 39 (38, 40)    | 39 (38, 40)   | 39 (38, 40)   |
| <b>Missing n (%)</b>                                   | 0 (--)         | 0 (--)        | 0 (--)        |
| <i>Characteristics on L&amp;D admission</i>            |                |               |               |
| <b>Temperature (F)</b>                                 |                |               |               |
| Mean (SD)                                              | 98.0 (0.81)    | 98.0 (0.81)   | 98.0 (0.79)   |
| <b>Missing n (%)</b>                                   | 47,977 (21.0)  | 23,172 (20.2) | 7,606 (20.3)  |
| <b>Systolic blood pressure</b>                         |                |               |               |
| Mean (SD)                                              | 124.1 (14.89)  | 124.1 (14.83) | 124.0 (14.9)  |

Venkatesh KK, Strauss RA, Grotegut C, Heine RP, Chescheir NC, Stringer JSA, et al. Machine learning and statistical models to predict postpartum hemorrhage. *Obstet Gynecol* 2020;135.

The authors provided this information as a supplement to their article.

©2020 American College of Obstetricians and Gynecologists.



|                                                                                             |                      |                |               |               |
|---------------------------------------------------------------------------------------------|----------------------|----------------|---------------|---------------|
|                                                                                             | <b>Missing n (%)</b> | 52,766 (23.0)  | 25,885 (22.6) | 9,263 (23.0)  |
| <b>Diastolic blood pressure</b>                                                             |                      |                |               |               |
| Mean (SD)                                                                                   |                      | 74.3 (11.6)    | 74.1 (11.9)   | 74.3 (11.6)   |
|                                                                                             | <b>Missing n (%)</b> | 52,800 (23.1)  | 25,898 (22.6) | 9,268 (24.7)  |
| <b>Trial of labor</b>                                                                       |                      | 192,074 (84.0) | 96,533 (84.1) | 31,636 (84.2) |
|                                                                                             | <b>Missing n (%)</b> | 0 (--)         | 0 (--)        | 0 (--)        |
| <b>Spontaneous labor</b>                                                                    |                      | 122,673 (53.7) | 63,154 (55.1) | 19,973 (53.2) |
|                                                                                             | <b>Missing n (%)</b> | 0 (--)         | 0 (--)        | 0 (--)        |
| <b>Premature rupture of membranes</b>                                                       |                      | 16,219 (7.1)   | 9,369 (8.1)   | 3,017 (8.0)   |
|                                                                                             | <b>Missing n (%)</b> | 0 (--)         | 0 (--)        | 0 (--)        |
| <b>Chorioamnionitis on admission</b>                                                        |                      | 1,527 (1.0)    | 841 (0.8)     | 202 (0.7)     |
|                                                                                             | <b>Missing n (%)</b> | 83,009 (36.3)  | 19,858 (19.8) | 10,220 (32.9) |
| *N if 47 less than the final study cohort as 47 participants were missing year of delivery. |                      |                |               |               |

Venkatesh KK, Strauss RA, Grotegut C, Heine RP, Chescheir NC, Stringer JSA, et al. Machine learning and statistical models to predict postpartum hemorrhage. *Obstet Gynecol* 2020;135.

The authors provided this information as a supplement to their article.

©2020 American College of Obstetricians and Gynecologists.

Page 9 of 14

| <b>Appendix 4. Frequency of postpartum hemorrhage overall and by mode of delivery</b>                                                                                                                    |                    |                         |                          |
|----------------------------------------------------------------------------------------------------------------------------------------------------------------------------------------------------------|--------------------|-------------------------|--------------------------|
| <b>Overall</b>                                                                                                                                                                                           | <b>Overall</b>     | <b>Vaginal delivery</b> | <b>Cesarean delivery</b> |
| <b>Mean EBL (SD), ml<sup>1</sup></b>                                                                                                                                                                     | 444.6 (2327.10)    | 315.0 (226.80)          | 769.9 (4,326.84)         |
| <b>Median EBL (IQR), ml<sup>1</sup></b>                                                                                                                                                                  | 350.0 (300, 600)   | 300.0 (250, 350)        | 700.0 (600, 800)         |
| <b>Primary outcome</b>                                                                                                                                                                                   |                    |                         |                          |
| <b>EBL ≥1,000 ml<sup>1</sup></b>                                                                                                                                                                         |                    |                         |                          |
| <b>N</b>                                                                                                                                                                                                 | 7,279/152,279      | 654/108,872             | 6,625/43,407             |
| <b>% (95% CI)</b>                                                                                                                                                                                        | 4.7 (4.67 to 4.88) | 0.6 (0.55 to 0.64)      | 15.2 (14.92 to 15.60)    |
| <sup>1</sup> EBL data available from 9 of 12 sites: 152,279/228,438 (66.7%).<br>Abbreviations: EBL (estimated blood loss), SD (standard deviation), IQR (interquartile range), CI (confidence interval). |                    |                         |                          |

Venkatesh KK, Strauss RA, Grotegut C, Heine RP, Chescheir NC, Stringer JSA, et al. Machine learning and statistical models to predict postpartum hemorrhage. *Obstet Gynecol* 2020;135.

The authors provided this information as a supplement to their article.

©2020 American College of Obstetricians and Gynecologists.

| <b>Appendix 5. Variables Included in Statistical and Machine Learning Models</b> |                             |                            |                                  |                      |
|----------------------------------------------------------------------------------|-----------------------------|----------------------------|----------------------------------|----------------------|
|                                                                                  | <b>2 statistical models</b> |                            | <b>2 machine learning models</b> |                      |
| <b>Variable</b>                                                                  | <b>Lasso Regression</b>     | <b>Logistic Regression</b> | <b>Extreme Gradient Boosted</b>  | <b>Random Forest</b> |
| Age                                                                              | X                           | X                          | X                                | X                    |
| Pre-pregnancy weight                                                             | X                           |                            | X                                | X                    |
| Pre-pregnancy BMI                                                                |                             | X                          | X                                | X                    |
| Admission weight                                                                 |                             | X                          | X                                | X                    |
| Chronic hypertension                                                             |                             | X                          | X                                | X                    |
| Parity                                                                           |                             | X                          | X                                | X                    |
| Anemia                                                                           | X                           |                            | X                                | X                    |
| Assisted reproductive technology                                                 | X                           | X                          | X                                | X                    |
| Breech presentation                                                              | X                           | X                          | X                                | X                    |
| Fetal macrosomia                                                                 | X                           | X                          | X                                | X                    |
| Preeclampsia without severe features                                             | X                           | X                          | X                                | X                    |
| Placental abruption                                                              | X                           | X                          | X                                | X                    |
| Small for gestational age, antenatal diagnosis                                   | X                           | X                          | X                                | X                    |
| Large for gestational age, antenatal diagnosis                                   | X                           | X                          | X                                | X                    |
| Antepartum vaginal bleeding                                                      | X                           | X                          | X                                | X                    |
| Placenta accreta                                                                 | X                           | X                          | X                                | X                    |
| Gestational age at delivery                                                      | X                           | X                          | X                                | X                    |
| Admission systolic blood pressure                                                | X                           | X                          | X                                | X                    |
| Trial of labor                                                                   | X                           | X                          | X                                | X                    |
| Chorioamnionitis on admission                                                    | X                           | X                          | X                                | X                    |
| Insurance status                                                                 | X                           | X                          |                                  | X                    |
| Maternal race                                                                    | X                           | X                          | X                                | X                    |
| Gestational diabetes                                                             | X                           |                            | X                                | X                    |
| Seizure disorder                                                                 | X                           | X                          | X                                | X                    |
| Multiple gestation                                                               | X                           |                            | X                                | X                    |
| Polyhydramnios                                                                   | X                           |                            | X                                | X                    |
| History of prior cesarean delivery                                               | X                           |                            | X                                | X                    |
| Preeclampsia with severe features                                                | X                           |                            | X                                | X                    |
| Antenatal steroids                                                               | X                           | X                          | X                                | X                    |
| Placenta previa                                                                  | X                           | X                          | X                                | X                    |
| Threatened preterm labor                                                         | X                           | X                          | X                                | X                    |
| Admission temperature                                                            | X                           |                            | X                                | X                    |

Venkatesh KK, Strauss RA, Grotegut C, Heine RP, Chescheir NC, Stringer JSA, et al. Machine learning and statistical models to predict postpartum hemorrhage. *Obstet Gynecol* 2020;135.

The authors provided this information as a supplement to their article.

©2020 American College of Obstetricians and Gynecologists.

|                                    |   |   |   |   |
|------------------------------------|---|---|---|---|
| Admission diastolic blood pressure | X | X | X | X |
| Spontaneous labor                  | X | X | X | X |
| Education status                   | X |   | X | X |
| Prior antepartum hospitalization   |   | X | X | X |
| Admission temperature              |   | X |   |   |
| Premature rupture of membranes     |   | X | X | X |
| Marital status                     |   | X | X | X |
| Tobacco use                        |   |   | X | X |
| Drug use                           |   |   | X | X |
| Non-gestational diabetes           |   |   | X | X |
| Gestational hypertension           |   |   | X | X |
| Heart disease                      |   |   | X | X |
| Thyroid disease                    |   |   | X | X |
| Renal disease                      |   |   | X | X |
| Asthma                             |   |   | X | X |
| Depression                         |   |   | X | X |
| Gastrointestinal disease           |   |   | X | X |
| History of seizures                |   |   | X | X |
| History of prior preterm birth     |   |   | X | X |
| Superimposed preeclampsia          |   |   | X |   |
| Ecclampsia                         |   |   | X | X |
| Fetal demise                       |   |   | X | X |
| Maternal GBS colonization          |   |   | X | X |
| Magnesium sulfate                  |   |   | X | X |

Venkatesh KK, Strauss RA, Grotegut C, Heine RP, Chescheir NC, Stringer JSA, et al. Machine learning and statistical models to predict postpartum hemorrhage. *Obstet Gynecol* 2020;135.

The authors provided this information as a supplement to their article.

©2020 American College of Obstetricians and Gynecologists.

**Appendix 6. Receiver operating characteristic curves of postpartum hemorrhage using two machine learning and two statistical models. Lasso, logistic regression with lasso regularization; XGBoost, extreme gradient boosting.**

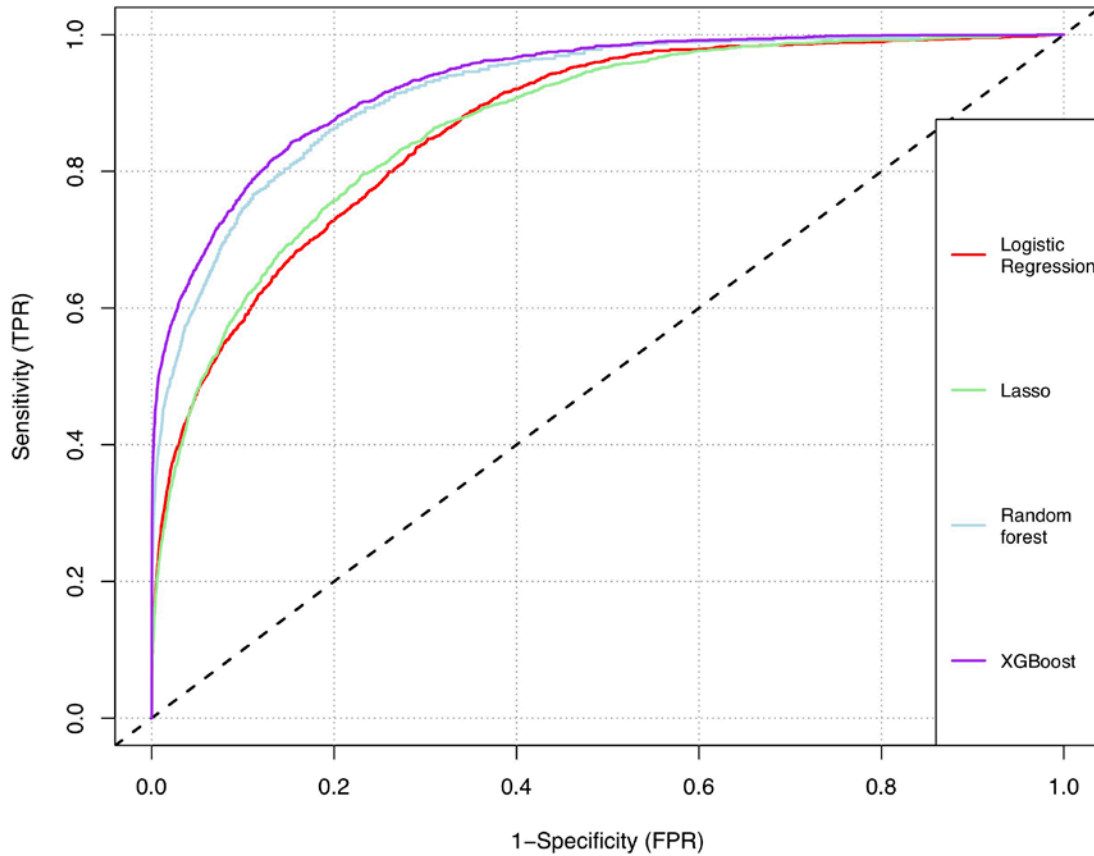

Venkatesh KK, Strauss RA, Grotegut C, Heine RP, Chescheir NC, Stringer JSA, et al. Machine learning and statistical models to predict postpartum hemorrhage. *Obstet Gynecol* 2020;135. The authors provided this information as a supplement to their article.

**Appendix 7. Calibration curve demonstrating the Extreme Gradient Boosting model’s performance of predicting postpartum hemorrhage by hospital site. The figure demonstrates the variation in gradient boosted model performance at each site in the cohort. The *grey line* indicates perfect agreement between the predicted probability of the model and the actual probability. Each *thin black line* labelled by a number is the calibration of the model in women from a single site. The *thicker black line* is the overall model calibration in the total cohort. The model overpredicts the actual risk at some sites when predicted probabilities are less than approximately 0.5. At site 41, the model underpredicts actual risk above 0.5.**

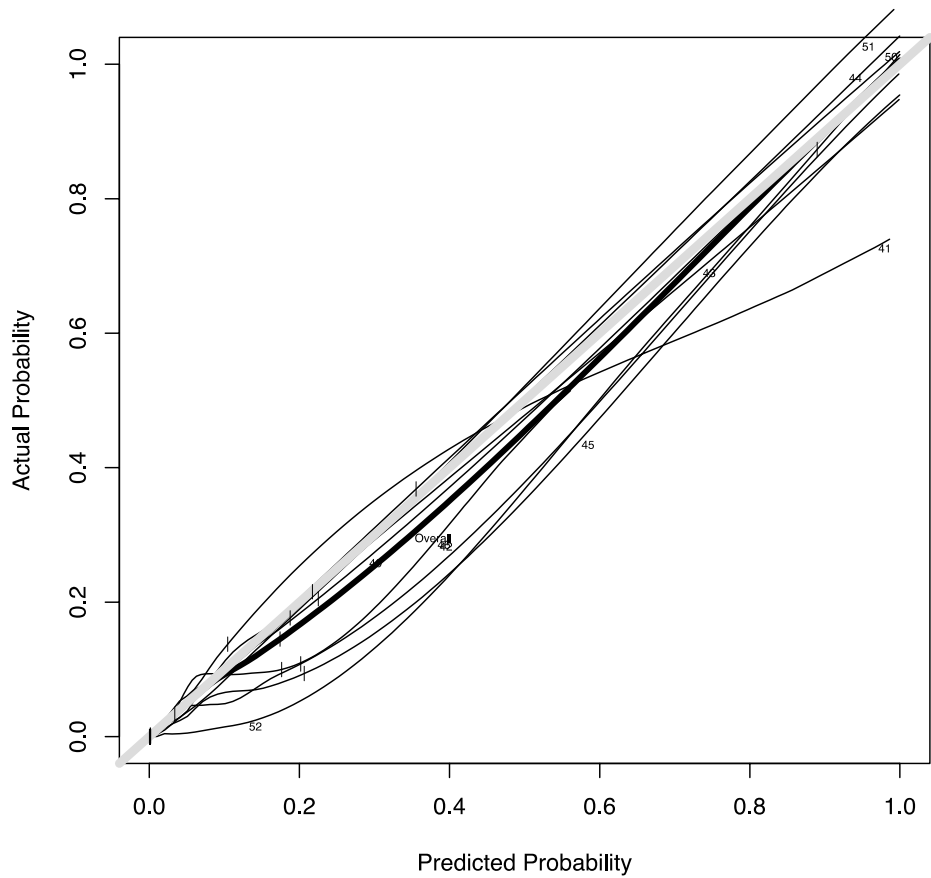

Venkatesh KK, Strauss RA, Grotegut C, Heine RP, Chescheir NC, Stringer JSA, et al. Machine learning and statistical models to predict postpartum hemorrhage. *Obstet Gynecol* 2020;135. The authors provided this information as a supplement to their article.

©2020 American College of Obstetricians and Gynecologists.
